# Supplementary figures and images for: Comparison of a short versus long-course antibiotic therapy for ventilator-associated pneumonia: a systematic review and meta-analysis of randomized controlled trials
Source: PubMed Central journal article supplement — eClinicalMedicine. 2023 Mar 1;58:101880. doi: 10.1016/j.eclinm.2023.101880 (PMC9995933; doi:10.1016/j.eclinm.2023.101880), 2023-03-01

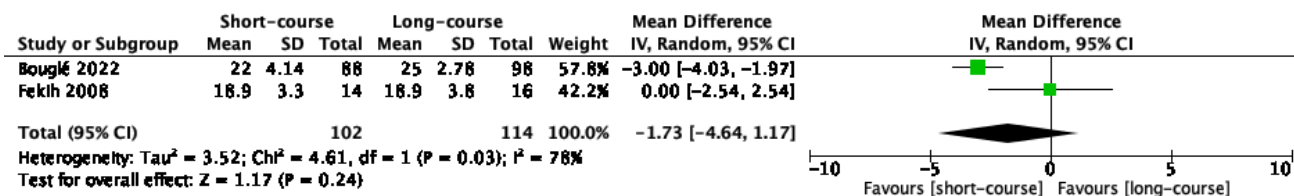

**Supplemental Figure 1.** Forest plot of mechanical ventilation duration (Sensitivity analyses)

Supplement: mmc1.pdf [file mmc1.pdf]
